# Supplementary material for: Interactions of the Immune System with Human Kidney Organoids
Source: PubMed Central journal article supplement (PMC11064018; doi:10.3389/ti.2024.12468), 2024-04-18
Supplement: Table1.pdf [file Table1.pdf]

## Supplementary table 1

| <b>Antibody</b> | <b>Type</b> | <b>Concentration</b> | <b>Company</b> | <b>Clone</b> | <b>Procedure</b>  | <b>Ab incubation time</b> |
|-----------------|-------------|----------------------|----------------|--------------|-------------------|---------------------------|
| Villin          | Rabbit      | 1/800                | Abcam          | EPR3491      | Optiview CC1 32'  | 32 minutes                |
| ECAD            | Mouse       | 0.314 µg/ml          | Ventana        | 36           | Optiview CC1 32'  | 16 minutes                |
| WT1             | Mouse       | 2.49 µg/ml           | Cell Marque    | 6F-H2        | Optiview CC1 56'  | 32 minutes                |
| Granzyme B      | Mouse       | 0.4 µg/ml            | Cell Marque    | EPR230       | Optiview CC1 32'  | 32 minutes                |
| Ki67            | Rabbit      | 0.4 µg/ml            | Ventana        | 30-9         | Ultraview CC1 36' | 28 minutes                |
| CD3             | Rabbit      | 0.4 µg/ml            | Ventana        | 2GV6         | Optiview CC1 32'  | 32 minutes                |
| CD4             | Rabbit      | 2.5 µg/ml            | Ventana        | SP35         | Ultraview CC1 64' | 8 minutes                 |
| CD8             | Rabbit      | 0.35 µg/ml           | Ventana        | SP57         | Optiview CC1 16'  | 32 minutes                |
| CD20            | Mouse       | 0.3 µg/ml            | Ventana        | L2G          | Ultraview CC1 64' | 44 minutes                |
| CD45            | Mouse       | 8.31 µg/ml           | Ventana        | 2B11         | Optiview CC1 32'  | 4 minutes                 |
| CD68            | Mouse       | 0.4 µg/ml            | Ventana        | KP1          | Optiview CC1 16'  | 8 minutes                 |
| CD163           | Mouse       | 0.23 µg/ml           | Ventana        | MRQ-26       | Optiview CC1 32'  | 20 minutes                |
| FOXP3           | Mouse       | 0.5 mg/ml            | Thermofisher   | 236A/E7      | Optiview CC1 32'  | 32 minutes                |
| HLA-DR          | Mouse       | 1/400                | DAKO           | CR3/43       | Ultraview CC1 64' | 32 minutes                |
| PD1             | Mouse       | 2.84 µg/ml           | Ventana        | NAT105       | Optiview CC1 16'  | 20 minutes                |
| PDL1            | Rabbit      | 1.61 µg/ml           | Ventana        | SP263        | Optiview CC1 64'  | 16 minutes                |
| Kim1            | Mouse       | 1/400                | R&D systems    | 219211       | Optiview CC1 32'  | 32 minutes                |
| Col1A1          | Rabbit      | 1/3000               | Abcam          | EPR7785      | Optiview CC1 32'  | 32 minutes                |
