# Supplementary material for: Interactions of the Immune System with Human Kidney Organoids
Source: PubMed Central journal article supplement (PMC11064018; doi:10.3389/ti.2024.12468), 2024-04-18
Supplement: Table2.pdf [file Table2.pdf]

## Supplementary table 2

| Cell Type    | Human cells   |               |            |             |             |
|--------------|---------------|---------------|------------|-------------|-------------|
|              | Loop of Henle | Tubular cells | Podocytes  | Stromal 1   | Stromal 2   |
| <b>Genes</b> | hg19-SLC12A1  | hg19-TSPAN12  | hg19-TCF21 | hg19-MEIS2  | hg19-MEIS2  |
|              | hg19-WFDC2    | hg19-IGFBP7   | hg19-PODXL | hg19-COL3A1 | hg19-COL3A1 |
|              | hg19-KCNJ1    | hg19-MPC2     | hg19-VEGFA | hg19-COL1A2 | hg19-COL1A2 |
|              | hg19-TFCP2L1  | hg19-HNF1B    | hg19-WT1   | hg19-EDNRA  | hg19-EDNRA  |
|              | hg19-CPS1     | hg19-SLC27A2  | hg19-SYNPO | hg19-PRRX2  | hg19-PRRX2  |
|              | hg19-ITM2C    | hg19-PAX8     | hg19-PTPRO | hg19-IGF1   | hg19-IGF1   |
|              | hg19-TMPRSS4  | hg19-CUBN     | hg19-NPHS2 | hg19-PRRX1  | hg19-PRRX1  |
|              | hg19-AFP      | hg19-PSMA2    | hg19-ITIH5 | hg19-THY1   | hg19-THY1   |
|              | hg19-MECOM    | hg19-BNIP3    | hg19-ANXA1 | hg19-MEOX1  | hg19-MEOX1  |
|              | hg19-CLDN10   | hg19-GLYATL1  | hg19-GPX3  | hg19-NT5E   | hg19-NT5E   |
|              | hg19-DUSP9    | hg19-SPP1     | hg19-CLIC5 | hg19-PDGFRB | hg19-PDGFRB |
|              | hg19-MAL      | hg19-AFP      | hg19-NPHS1 | hg19-PDGFRB | hg19-PDGFRB |
|              | hg19-TFAP2B   | hg19-PDZK1    | hg19-MYL9  | hg19-COL1A1 | hg19-COL1A1 |
|              | hg19-CLU      | hg19-SMIM24   | hg19-MAFB  | hg19-FGF2   | hg19-FGF2   |
|              | hg19-ACPP     | hg19-SLC22A8  |            | hg19-FGF1   | hg19-FGF1   |
|              | hg19-LDHB     | hg19-CALB1    |            | hg19-MEIS2  | hg19-MEIS2  |
|              | hg19-CA12     | hg19-ALDH1A1  |            |             |             |
|              | hg19-ACSL4    | hg19-MAL      |            |             |             |
|              | hg19-TUBB2B   | hg19-LRP2     |            |             |             |
|              | hg19-CLCN5    | hg19-SLC3A1   |            |             |             |
|              |               | hg19-VIL1     |            |             |             |
|              |               | hg19-CDH1     |            |             |             |
|              |               | hg19-MUC1     |            |             |             |
|              |               | hg19-UMOD     |            |             |             |
|              |               | hg19-CDH16    |            |             |             |
|              |               | hg19-ESRRG    |            |             |             |
|              |               | hg19-ERBB4    |            |             |             |
|              |               | hg19-DEFB1    |            |             |             |
|              |               | hg19-TMEM52B  |            |             |             |
|              |               | hg19-SLC12A1  |            |             |             |
|              |               | hg19-GATA3    |            |             |             |
|              |               | hg19-MECOM    |            |             |             |
|              |               | hg19-WFDC2    |            |             |             |
|              |               | hg19-POU3F3   |            |             |             |
|              |               | hg19-SLC9A3   |            |             |             |
|              |               | hg19-LRP2     |            |             |             |
|              |               | hg19-MUC1     |            |             |             |

| Human cells |             | Mouse Cells |             |             |              |
|-------------|-------------|-------------|-------------|-------------|--------------|
| Muscle like | Endothelial | Macrophages | Endothelial | Stromal     | Granulocytes |
| hg19-ACTC1  | hg19-PECAM1 | mm10-Itgam  | mm10-Pecam1 | mm10-Meis2  | mm10-Cd9     |
| hg19-MYLPF  | hg19-CD34   | mm10-Cd14   | mm10-Cd34   | mm10-Col3a1 | mm10-Trem1   |
| hg19-MYOG   | hg19-MMP1   | mm10-Cd40   | mm10-Mmp1   | mm10-Col1a2 | mm10-Csf2rb  |
| hg19-MYL1   | hg19-ESAM   | mm10-Cd64   | mm10-Esam   | mm10-Ednra  | mm10-Csf3r   |
| hg19-MYL4   | hg19-ESM1   | mm10-Cd68   | mm10-Esm1   | mm10-Prrx2  | mm10-Il1r2   |
| hg19-TNNT1  | hg19-APLN   | mm10-Tlr7   | mm10-Apln   | mm10-Igf1   | mm10-Il1rn   |
| hg19-PDLIM3 | hg19-ENG    | mm10-Tom1   | mm10-Eng    | mm10-Prrx1  | mm10-Cxcr2   |
| hg19-MRLN   | hg19-KDR    | mm10-Fdg4   | mm10-Kdr    | mm10-Thy1   | mm10-Il13ra1 |
| hg19-MYOD1  | hg19-ANGPT2 | mm10-Ctsb   | mm10-Angpt2 | mm10-Meox1  | mm10-Cd9     |
| hg19-TNNI1  | hg19-SOX17  | mm10-Ctsd   | mm10-Sox17  | mm10-Nt5e   |              |
| hg19-CKB    | hg19-CDH5   | mm10-Ctsl   | mm10-Cdh5   | mm10-Pdgfra |              |
| hg19-USP18  |             | mm10-Cd4    |             | mm10-Pdgfrb |              |
| hg19-NNAT   |             | mm10-Cd8a   |             | mm10-Col1a1 |              |
| hg19-TPM2   |             | mm10-Cd3g   |             | mm10-Fgfbp2 |              |
| hg19-PFN1   |             | mm10-Cd209f |             | mm10-Fgfbp1 |              |
| hg19-RPS2   |             | mm10-Cd209g |             |             |              |
| hg19-RPL18A |             |             |             |             |              |
| hg19-NACA   |             |             |             |             |              |
| hg19-RPS5   |             |             |             |             |              |
| hg19-RPS3A  |             |             |             |             |              |
| hg19-TAGLN  |             |             |             |             |              |
| hg19-ACTA2  |             |             |             |             |              |
| hg19-SEPW1  |             |             |             |             |              |
